# Supplementary material for: Forecasting Progressive Trends in Keratoconus by Means of a Time Delay Neural Network
Source: MDPI journal article supplement (doi:10.3390/jcm10153238), 2021-07-22
Supplement: s1 [file s1]

**Supplementary Material. Table S2. ABCD classification, number of eyes maximum keratometry (Kmax), minimum pachymetry (Pmin) and Belin-Ambrósio Deviation (BADD). Mean (SD).**

| <b>ABCD CLASSIFICATION</b> | <b>NUMBER</b> | <b>Kmax</b>  | <b>Pmin</b>    | <b>BADD</b>  |
|----------------------------|---------------|--------------|----------------|--------------|
| A0B0C0                     | 101           | 45.04 (1.93) | 525.08 (20.08) | 1.94 (0.86)  |
| A0B0C1                     | 46            | 46.42 (2.03) | 475.50 (10.81) | 3.02 (1.04)  |
| A0B0C2                     | 13            | 45.96 (1.26) | 444.46 (6.02)  | 3.93 (0.98)  |
| A0B1C0                     | 18            | 47.69 (2.07) | 523.44 (16.16) | 3.59 (0.97)  |
| A0B1C1                     | 18            | 48.10 (2.00) | 473.39 (10.02) | 4.12 (0.64)  |
| A0B1C2                     | 2             | 46.95 (0.45) | 447.00 (1.00)  | 5.01 (0.36)  |
| A0B2C0                     | 22            | 48.41 (2.10) | 517.18 (15.13) | 4.69 (1.14)  |
| A0B2C1                     | 15            | 49.31 (2.73) | 473.80 (12.60) | 5.74 (1.16)  |
| A0B2C2                     | 3             | 48.00 (1.39) | 441.67 (9.10)  | 5.52 (0.12)  |
| A0B3C1                     | 1             | 50.30 (0.00) | 482.00 (0.00)  | 6.49 (0.00)  |
| A0B3C2                     | 1             | 45.20 (0.00) | 434.00 (0.00)  | 8.61 (0.00)  |
| A0B4C0                     | 1             | 50.60 (0.00) | 502.00 (0.00)  | 7.82 (0.00)  |
| A0B4C3                     | 1             | 51.50 (0.00) | 378.00 (0.00)  | 8.41 (0.00)  |
| A1B0C0                     | 2             | 48.80 (0.60) | 506.00 (5.00)  | 2.06 (0.37)  |
| A1B0C1                     | 2             | 47.40 (0.10) | 486.00 (4.00)  | 1.74 (0.49)  |
| A1B1C0                     | 3             | 50.93 (0.82) | 502.00 (8.29)  | 3.90 (0.28)  |
| A1B1C1                     | 6             | 51.17 (1.08) | 473.83 (6.04)  | 3.95 (0.58)  |
| A1B1C2                     | 4             | 49.23 (1.12) | 438.75 (8.41)  | 4.47 (1.00)  |
| A1B2C0                     | 17            | 49.38 (1.47) | 520.53 (15.36) | 4.74 (1.17)  |
| A1B2C1                     | 19            | 50.25 (1.49) | 472.21 (12.71) | 5.59 (0.83)  |
| A1B2C2                     | 11            | 50.23 (1.75) | 436.09 (10.25) | 5.88 (0.93)  |
| A1B3C1                     | 2             | 48.35 (0.95) | 475.00 (2.00)  | 7.63 (0.25)  |
| A2B1C1                     | 1             | 49.60 (0.00) | 467.00 (0.00)  | 5.14 (0.00)  |
| A2B1C2                     | 1             | 50.70 (0.00) | 439.00 (0.00)  | 5.45 (0.00)  |
| A2B2C0                     | 22            | 53.38 (2.68) | 518.00 (15.08) | 5.52 (1.16)  |
| A2B2C1                     | 36            | 52.88 (2.48) | 469.08 (10.95) | 6.19 (0.92)  |
| A2B2C2                     | 18            | 52.78 (2.19) | 435.28 (10.55) | 6.65 (1.21)  |
| A2B3C0                     | 14            | 52.85 (2.36) | 510.43 (17.53) | 7.23 (0.89)  |
| A2B3C1                     | 30            | 54.03 (2.30) | 469.23 (9.84)  | 7.71 (1.15)  |
| A2B3C2                     | 13            | 53.89 (2.24) | 431.54 (9.76)  | 7.95 (0.96)  |
| A2B4C0                     | 9             | 54.38 (3.26) | 507.00 (11.22) | 7.84 (0.96)  |
| A2B4C1                     | 27            | 55.51 (2.85) | 466.81 (9.22)  | 9.13 (1.07)  |
| A2B4C2                     | 19            | 55.16 (2.53) | 434.74 (9.85)  | 9.91 (1.21)  |
| A2B4C3                     | 2             | 54.90 (1.60) | 384.00 (4.00)  | 12.62 (1.63) |
| A3B3C1                     | 1             | 55.10 (0.00) | 487.00 (0.00)  | 6.95 (0.00)  |
| A3B4C0                     | 3             | 59.70 (2.45) | 501.00 (2.94)  | 10.89 (0.54) |
| A3B4C1                     | 20            | 57.30 (2.53) | 472.55 (12.32) | 10.57 (1.60) |
| A3B4C2                     | 17            | 58.58 (2.66) | 427.71 (13.65) | 11.15 (1.27) |
| A3B4C3                     | 4             | 58.63 (4.34) | 386.75 (15.93) | 12.84 (2.13) |
| A4B4C1                     | 16            | 63.06 (4.57) | 473.00 (10.00) | 12.25 (1.86) |
| A4B4C2                     | 39            | 62.82 (5.41) | 433.13 (13.63) | 12.91 (2.77) |
| A4B4C3                     | 28            | 64.54 (6.29) | 384.57 (14.20) | 15.40 (4.09) |
| A4B4C4                     | 1             | 81.00 (0.00) | 230.00 (0.00)  | 41.05 (0.00) |
| <b>Total</b>               | <b>629</b>    |              |                |              |
