# Supplementary material for: Forecasting Progressive Trends in Keratoconus by Means of a Time Delay Neural Network
Source: MDPI journal article supplement (doi:10.3390/jcm10153238), 2021-07-22
Supplement: s1 [file s1]

**Supplementary Material. Table S1. TOP 10 parameters. Coefficient of variation (repeatability), monotonicity and consistency (% of eyes) of the best Pentacam variables, with partial scores, and global score.**

|      |                         |         |      | VALUES        |              |             | PARTIAL AND GLOBAL SCORES |              |             |              |                                                                                            |
|------|-------------------------|---------|------|---------------|--------------|-------------|---------------------------|--------------|-------------|--------------|--------------------------------------------------------------------------------------------|
| RANK | VARIABLE                | SURFACE | TYPE | REPEATABILITY | MONOTONICITY | CONSISTENCY | REPEATABILITY             | MONOTONICITY | CONSISTENCY | GLOBAL SCORE |                                                                                            |
| 1    | KMaxZonalMean5mm        | F       | CUR  | 0.42%         | 0.47         | 73.54%      | 4                         | 2            | 18          | <b>24</b>    | Redundant. 3mm area is chosen since it might be less influenced by peripheral measurements |
| 2    | <b>KMaxZonalMean3mm</b> | F       | CUR  | 0.48%         | 0.47         | 73.79%      | 6                         | 1            | 17          | <b>24</b>    |                                                                                            |
| 3    | KMaxZonalMean4mm        | F       | CUR  | 0.45%         | 0.47         | 72.82%      | 5                         | 4            | 25          | <b>34</b>    |                                                                                            |
| 4    | K2F (D)                 | F       | CUR  | 0.61%         | 0.46         | 73.06%      | 11                        | 6            | 21          | <b>38</b>    | Redundant. Radius is chosen since it does not require assumptions about keratometric index |
| 5    | <b>RsF (mm)</b>         | F       | CUR  | 0.49%         | 0.45         | 72.82%      | 7                         | 9            | 23          | <b>39</b>    |                                                                                            |
| 6    | <b>BFSFront8mm</b>      | F       | BFS  | 0.27%         | 0.43         | 73.06%      | 1                         | 27           | 20          | <b>48</b>    | Slightly redundant<br>One-point parameter                                                  |
| 7    | <b>RmB (mm)</b>         | B       | CUR  | 0.86%         | 0.43         | 75.73%      | 17                        | 31           | 10          | <b>58</b>    |                                                                                            |
| 8    | <b>LOGIK</b>            | -       | IND  | 3.58%         | 0.47         | 76.21%      | 47                        | 3            | 9           | <b>59</b>    |                                                                                            |
| 9    | RmF (mm)                | F       | CUR  | 0.39%         | 0.45         | 70.39%      | 3                         | 13           | 44          | <b>60</b>    |                                                                                            |
| 10   | RMin (mm)               | F       | CUR  | 0.84%         | 0.45         | 72.09%      | 16                        | 14           | 33          | <b>63</b>    |                                                                                            |

SURFACE: F (Front), B(Back).

TYPE: CUR (Curvature), BFS (Best Fit Sphere), IND (Index)

VARIABLES: KmaxZonalMean- average keratometry in areas of 3, 4 or 5mm around the point of maximum keratometry, K2- steepest keratometry (D), Rs- steepest radius (mm), BFS-Best Fit Sphere, Rm- Mean radius (mm), Rmin- Minimum radius (mm)
